# Supplementary material for: Carcinoma-associated fibroblasts promote the stemness and chemoresistance of colorectal cancer by transferring exosomal lncRNA H19
Source: PubMed Central journal article supplement — Theranostics. 2018 Jun 24;8(14):3932–48. doi: 10.7150/thno.25541 (PMC6071523; doi:10.7150/thno.25541), 2018-06-24
Supplement: thnov08p3932s1.pdf [file thnov08p3932s1.pdf]

## Supplementary materials

### Carcinoma associated fibroblasts promote the stemness and chemoresistance of colorectal cancer by transferring exosomal lncRNA H19

#### Supplementary Figures

##### Supplementary Figure1

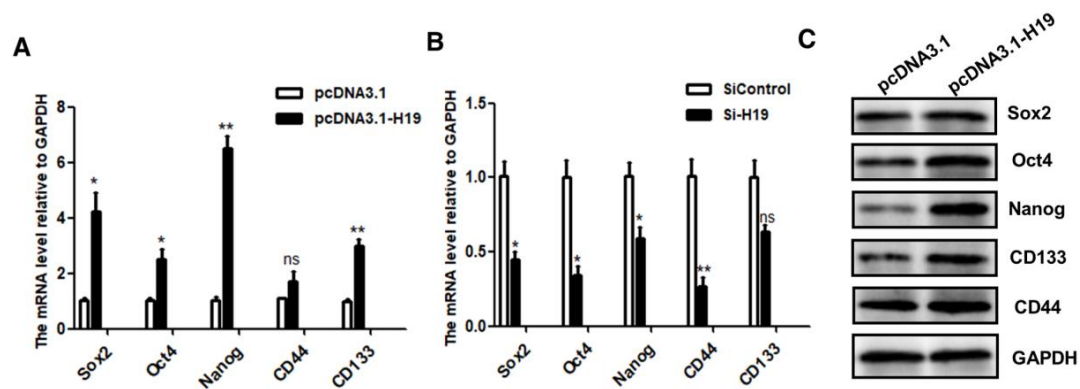

(A) The mRNA levels of Sox2, Oct4, Nanog, CD44 and CD133 in SW480 cells with overexpression of lncRNA H19 were analyzed by qRT-PCR. (B) The mRNA levels of Sox2, Oct4, Nanog, CD44 and CD133 in HCT116 cells with knockdown of lncRNA H19 were analyzed. (C) The protein levels of Sox2, Oct4, Nanog, CD44 and CD133 in SW480 cells with overexpression of lncRNA H19 were analyzed by western blot. Data were shown as mean  $\pm$  S.D. from three independent experiments. \* $p < 0.05$ , \*\* $p < 0.01$ .

## Supplementary Figure2

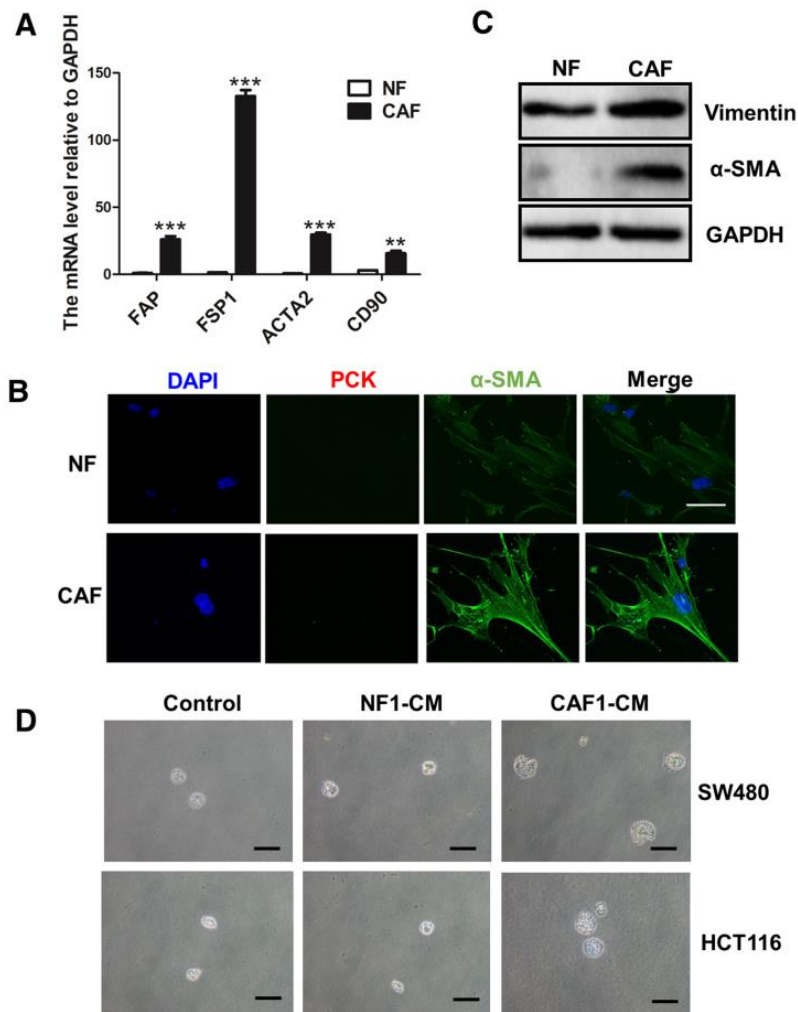

(A) qRT-PCR analyzed the mRNA expression levels of FAP, FSP1, ACTA2 and CD90 in isolated CAFs and NFs. (B) Immunofluorescence staining showed the subcellular location and the expression of Pan cytokeratins and  $\alpha$ -SMA in isolated CAFs and NFs. Scale bar, 10  $\mu$ M. (C) The protein levels of vimentin and  $\alpha$ -SMA were detected Western blot in isolated CAFs and NFs. (D) The capacity of cells to form spheres was assessed. Representative images are presented. Scale bars, 200  $\mu$ m. Data were shown as mean  $\pm$  S.D. from three independent experiments. \*\*P < 0.01, \*\*\*P < 0.001.

## Supplementary Figure3

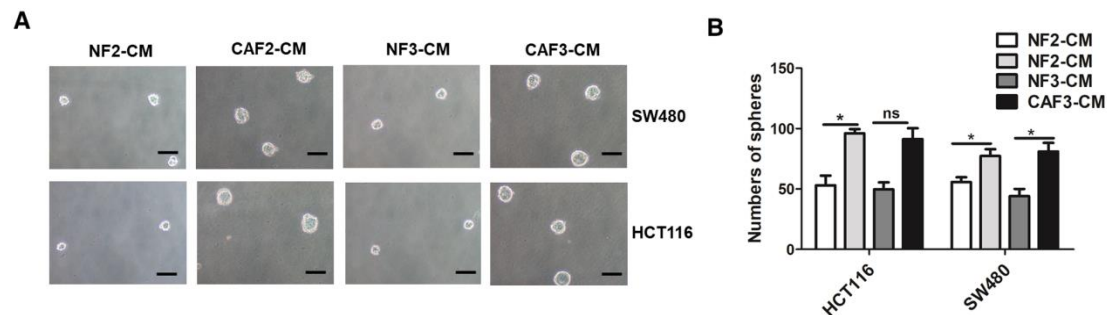

(A) The SW480 and HCT116 cells were incubated with CM from CAFs or NFs of other patients (#2 and #3) for 24 hour, and the capacity of cells to form spheres was assessed. Representative images were presented. Scale bars, 200  $\mu\text{m}$ . (B) The size and numbers of mammospheres were counted. Data were shown as mean  $\pm$  S.D. from three independent experiments. \* $p < 0.05$ .

#### Supplementary Figure4

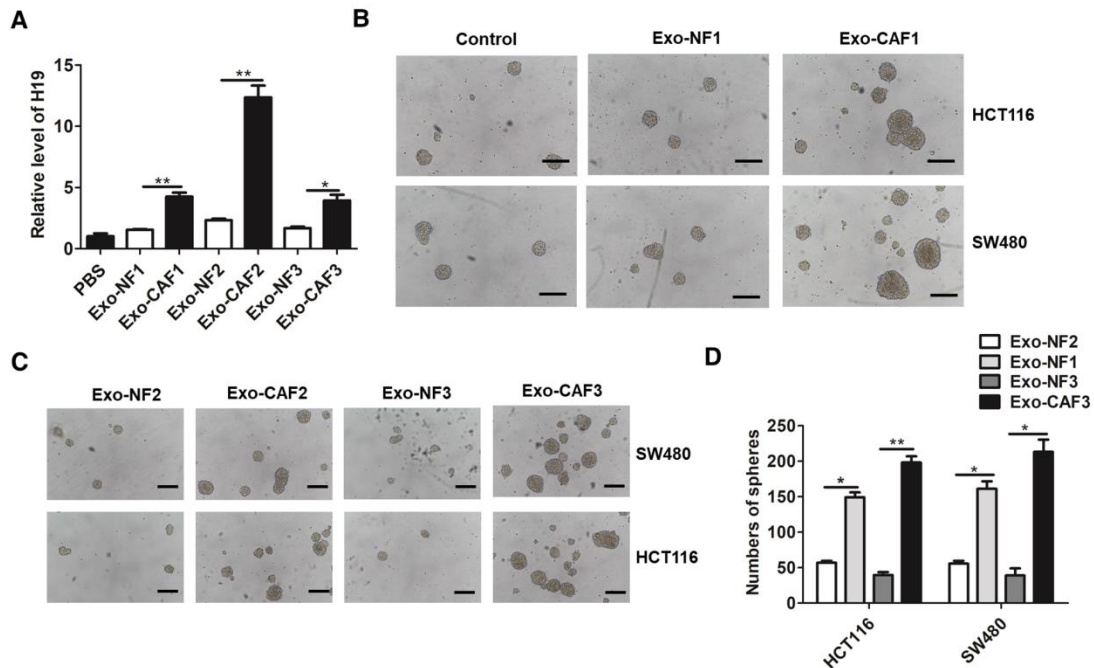

(A) The HCT116 cells were incubated with indicated exosomes or PBS for 48 h, and the level of H19 was analyzed by qRT-PCR.(B) The SW480 and HCT116 were incubated with exosomes (10  $\mu\text{g}/\text{mL}$  from CAF1 or NF1 for 24 h, and the capacity of cells to form spheres was assessed. Representative images were presented. Scale bars, 200  $\mu\text{m}$ .(C)The SW480 and HCT116 cells were incubated with exosomes from CAFs or NFs of other patients (#2 and #3) for 24 hour, and the capacity of cells to form spheres was assessed. Representative images were presented. Scale bars, 200  $\mu\text{m}$ . (D) The size and numbers of mammospheres were counted. Data were shown as mean  $\pm$  S.D. from three independent experiments. \* $p < 0.05$ , \*\* $p < 0.01$ .

Supplementary Figure5

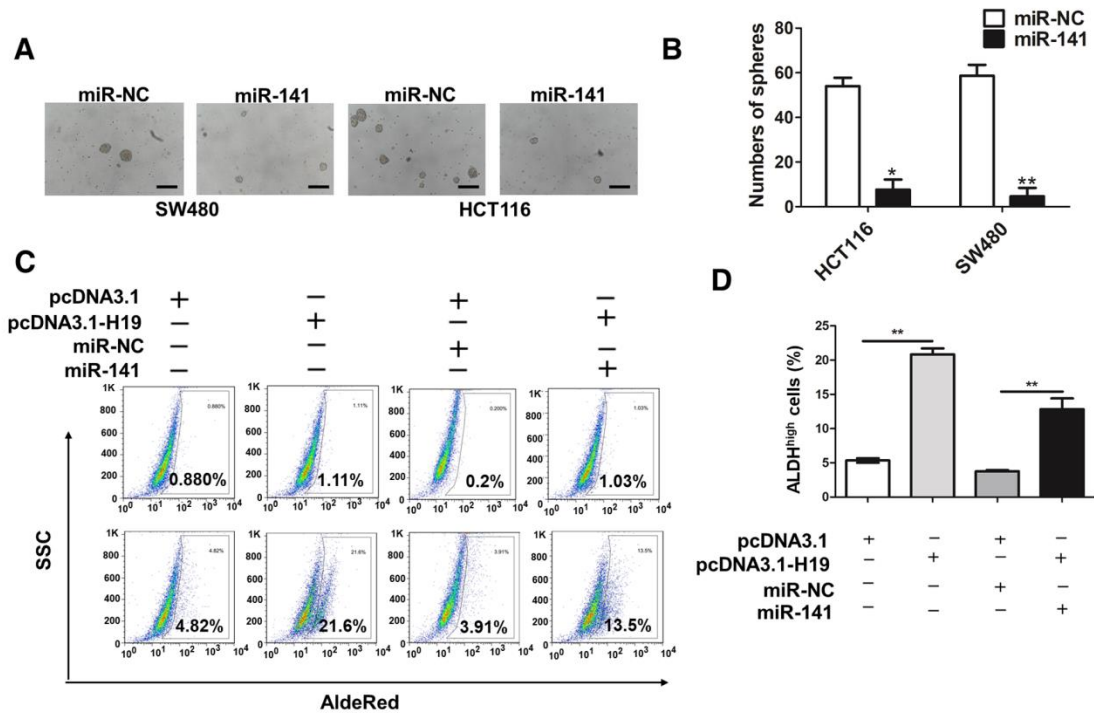

(A-B) The overexpression of miR-141 significantly decreased sphere forming capacities of SW480 and HCT116 cells. Scale bars, 200  $\mu$ m. (C-D) The SW480 cells were transfected with plasmids with overexpression of lncRNA H19 (pcDNA3.1-H19), an empty vector (pcDNA3.1), miR-NC (mimic control) or miR-141 (mimic). AldeRed ALDH detection assay was performed. Data were shown as mean  $\pm$  S.D. from three independent experiments. \* $P < 0.05$ , \*\* $P < 0.01$ .

## Supplemental Tables

### Supplemental Table 1. Primers used for real-time quantitative PCR analysis

| Gene                   | Sequence                         |
|------------------------|----------------------------------|
| Human H19              | Forward: GCACCTTGGACATCTGGAGT    |
|                        | Reverse: TTCTTCCAGCCCTAGCTCA     |
| Mouse H19              | Forward: GAACAGAAGCATTCTAGGCTGG  |
|                        | Reverse: TTCTAAGTGAATTACGGTGGGTG |
| Human FAP              | Forward: ATGAGCTTCCTCGTCCAATTCA  |
|                        | Reverse: AGACCACCAGAGGCATATTTTG  |
| Human FSP1             | Forward: GATGAGCAACTTGGACAGCAA   |
|                        | Reverse: CTGGGCTGCTTATCTGGGAAG   |
| Human ACTA2            | Forward: GTGTTGCCCTGAAGAGCAT     |
|                        | Reverse: GCTGGGACATTGAAAGTCTCA   |
| Human CD90             | Forward: ATCGCTCTCTGCTAACAGTC    |
|                        | Reverse: CTCGTA CTGGATGGGTGAACT  |
| Human $\beta$ -catenin | Forward: AAAGCGGCTGTTAGTCACTGG   |
|                        | Reverse: CGAGTCATTGCATACTGTCCAT  |
| Human c-Myc            | Forward: GGCTCCTGGCAAAGGTCA      |
|                        | Reverse: CTGCGTAGTTGTGCTGATGT    |
| Human CCDN1            | Forward: GCTGCGAAGTGAAACCATC     |
|                        | Reverse: CCTCCTTCTGCACACATTGAA   |
| Human CD44             | Forward: CTGCCGCTTTGCAGGTGTA     |
|                        | Reverse: CATTGTGGGCAAGGTGCTATT   |
| Mouse GAPDH            | Forward: GGTGAAGGTCGGTGTGAACG    |
|                        | Reverse: CTCGCTCCTGGAAGATGGTG    |
| Human GAPDH            | Forward: AGAAGGCTGGGGCTCATTG     |
|                        | Reverse: AGGGGCCATCCACAGTCTTC    |

**Supplemental Table 2. The upregulated expression of lncRNAs in colon tissues identified from NGS data**

| AccID         | Tumor       | Control | Fold<br>Change | Log2FC | P-Value  | FDR       |
|---------------|-------------|---------|----------------|--------|----------|-----------|
| LOC102633776  | 84.07427917 | 0       | Inf            | 20     | 3.03E-20 | 2.32E-17  |
| LOC102640510  | 70.41941376 | 0       | Inf            | 20     | 9.78E-19 | 5.62E-16  |
| LOC102640929  | 114.4780345 | 0       | Inf            | 20     | 1.63E-18 | 8.67E-16  |
| LOC102637941  | 65.51798588 | 0       | Inf            | 20     | 2.70E-17 | 1.33E-14  |
| 2700046A07Rik | 148.0410745 | 0       | Inf            | 20     | 3.32E-16 | 1.21E-13  |
| LOC102635396  | 55.55351096 | 0       | Inf            | 20     | 1.25E-15 | 4.31E-13  |
| 9330117O12Rik | 106.3546416 | 0       | Inf            | 20     | 1.89E-12 | 3.72E-10  |
| LOC102638539  | 51.9181919  | 0       | Inf            | 20     | 3.29E-12 | 5.97E-10  |
| LOC102636276  | 35.05291829 | 0       | Inf            | 20     | 4.22E-10 | 5.11E-08  |
| LOC102632850  | 41.63857362 | 0       | Inf            | 20     | 1.33E-09 | 1.39E-07  |
| 4930432O09Rik | 36.94746158 | 0       | Inf            | 20     | 1.61E-08 | 1.41E-06  |
| Gm6522        | 62.13687203 | 0       | Inf            | 20     | 7.47E-08 | 5.60E-06  |
| Mcpt-ps1      | 25.82825489 | 0       | Inf            | 20     | 2.78E-07 | 1.78E-05  |
| LOC102637960  | 18.65951061 | 0       | Inf            | 20     | 6.10E-07 | 3.59E-05  |
| LOC102632377  | 21.13628274 | 0       | Inf            | 20     | 7.06E-07 | 4.06E-05  |
| Defa-ps6      | 77.75127673 | 0       | Inf            | 20     | 1.02E-06 | 5.61E-05  |
| LOC102638649  | 16.65652332 | 0       | Inf            | 20     | 1.76E-06 | 8.54E-05  |
| LOC102637134  | 16.07716152 | 0       | Inf            | 20     | 2.60E-06 | 1.19E-04  |
| 2210409E12Rik | 9.80462062  | 0       | Inf            | 20     | 1.38E-05 | 4.82E-04  |
| Tpsab1        | 40.84069161 | 0       | Inf            | 20     | 3.53E-05 | 0.0010595 |
| Gm3103        | 11.59482177 | 0       | Inf            | 20     | 3.73E-05 | 0.0010992 |
| Gm10872       | 23.40119485 | 0       | Inf            | 20     | 4.84E-05 | 0.0013669 |
| Gm12202       | 12.22996044 | 0       | Inf            | 20     | 5.11E-05 | 0.0014165 |
| LOC102640323  | 11.27764948 | 0       | Inf            | 20     | 1.12E-04 | 0.0026797 |
| LOC102636076  | 9.698205544 | 0       | Inf            | 20     | 2.66E-04 | 0.005517  |

|               |                    |                 |                 |                    |                 |                 |
|---------------|--------------------|-----------------|-----------------|--------------------|-----------------|-----------------|
| LOC102633899  | 9.276117714        | 0               | Inf             | 20                 | 5.10E-04        | 0.0092652       |
| Gm17793       | 9.433391687        | 0               | Inf             | 20                 | 9.86E-04        | 0.0157375       |
| Gm5966        | 7.378994097        | 0               | Inf             | 20                 | 0.001189        | 0.0180525       |
| LOC102635800  | 8.065895784        | 0               | Inf             | 20                 | 0.00142         | 0.0202808       |
| Olfr755-ps1   | 6.957744371        | 0               | Inf             | 20                 | 0.001753        | 0.023935        |
| LOC102632516  | 6.008873853        | 0               | Inf             | 20                 | 0.00183         | 0.0247158       |
| Gm12603       | 7.115018344        | 0               | Inf             | 20                 | 0.002031        | 0.0264758       |
| LOC102634083  | 7.378685388        | 0               | Inf             | 20                 | 0.002087        | 0.0269027       |
| 4930425O10Rik | 7.430161704        | 0               | Inf             | 20                 | 0.002178        | 0.0277047       |
| LOC102633064  | 7.538274993        | 0               | Inf             | 20                 | 0.002195        | 0.0278238       |
| LOC102640363  | 6.641454198        | 0               | Inf             | 20                 | 0.003019        | 0.0352939       |
| Gm16063       | 11.90934771        | 0               | Inf             | 20                 | 0.003269        | 0.0377079       |
| LOC102635376  | 11.96772691        | 0               | Inf             | 20                 | 0.003274        | 0.0377079       |
| LOC102640066  | 6.957722365        | 0               | Inf             | 20                 | 0.003327        | 0.0380427       |
| D230030E09Rik | 6.747251856        | 0               | Inf             | 20                 | 0.003815        | 0.0421047       |
| Gm18622       | 6.482151296        | 0               | Inf             | 20                 | 0.004221        | 0.0453515       |
| Gm11978       | 368.1168678        | 0.331065        | 1111.918        | 10.11883475        | 6.86E-13        | 1.58E-10        |
| 4921525O09Rik | 205.246391         | 0.331065        | 619.9585        | 9.276027749        | 3.48E-28        | 4.80E-25        |
| Gm8714        | 1576.32309         | 4.051349        | 389.086         | 8.603945121        | 4.80E-13        | 1.14E-10        |
| <b>H19</b>    | <b>4100.680424</b> | <b>10.93021</b> | <b>375.1693</b> | <b>8.551398048</b> | <b>2.50E-10</b> | <b>3.19E-08</b> |
| 1500009C09Rik | 256.3800207        | 0.989924        | 258.9897        | 8.016750757        | 1.42E-31        | 4.89E-28        |
| LOC102638971  | 225.7463663        | 1.084588        | 208.1402        | 7.701411756        | 7.30E-25        | 8.39E-22        |
| Gm15304       | 47.32767285        | 0.329429        | 143.6656        | 7.166570469        | 1.59E-05        | 5.31E-04        |
| Pla2g2a       | 5268.673289        | 40.38827        | 130.4506        | 7.027359523        | 4.66E-43        | 3.22E-39        |
| LOC102632099  | 35.63058188        | 0.329429        | 108.1584        | 6.757002528        | 1.28E-10        | 1.74E-08        |
| 1700020N18Rik | 33.36081782        | 0.329429        | 101.2685        | 6.66204114         | 7.56E-10        | 8.84E-08        |
| LOC102635136  | 52.54543491        | 0.658859        | 79.75217        | 6.317451913        | 7.39E-13        | 1.64E-10        |
| LOC102637628  | 24.71752314        | 0.329429        | 75.0313         | 6.229420667        | 6.18E-06        | 2.46E-04        |
| LOC102635855  | 41.27316677        | 0.660494        | 62.48831        | 5.965514357        | 4.10E-11        | 5.89E-09        |

---

|               |             |          |          |             |          |           |
|---------------|-------------|----------|----------|-------------|----------|-----------|
| LOC102632387  | 41.53173918 | 0.706191 | 58.8109  | 5.878011738 | 6.30E-11 | 8.68E-09  |
| LOC102634552  | 18.71149432 | 0.329429 | 56.79969 | 5.827811262 | 0.001939 | 0.0256798 |
| LOC102635415  | 125.386594  | 2.354974 | 53.24331 | 5.734528256 | 2.02E-19 | 1.39E-16  |
| LOC100505034  | 136.4719887 | 2.739912 | 49.8089  | 5.638331605 | 5.12E-06 | 2.10E-04  |
| 5730457N03Rik | 513.3585499 | 10.43461 | 49.19768 | 5.620518447 | 3.77E-23 | 3.71E-20  |
| LOC102637557  | 16.18154766 | 0.329429 | 49.11991 | 5.618236083 | 2.17E-05 | 7.02E-04  |
| Gm2373        | 14.49427714 | 0.331065 | 43.78079 | 5.452226185 | 2.96E-05 | 9.17E-04  |
| BC023105      | 309.3306035 | 7.45313  | 41.50345 | 5.375159337 | 2.26E-10 | 2.94E-08  |
| A730046J19Rik | 81.4875415  | 1.976577 | 41.2266  | 5.365503488 | 8.70E-10 | 9.83E-08  |
| Gm15302       | 43.00234238 | 1.082953 | 39.70842 | 5.311372966 | 1.73E-04 | 0.0037976 |
| Gm807         | 13.01838124 | 0.329429 | 39.51796 | 5.304436553 | 9.72E-05 | 0.0023963 |
| 4930461G14Rik | 89.82085285 | 2.309277 | 38.89566 | 5.281537318 | 2.44E-09 | 2.34E-07  |
| LOC102634943  | 12.64887253 | 0.329429 | 38.3963  | 5.262895278 | 8.10E-04 | 0.0133025 |
| LOC102636017  | 12.38694771 | 0.329429 | 37.60121 | 5.232707218 | 1.69E-04 | 0.0037242 |
| LOC101055851  | 395.5687012 | 10.67428 | 37.05812 | 5.211717703 | 3.38E-07 | 2.12E-05  |
| LOC102640561  | 24.40584223 | 0.660494 | 36.95088 | 5.207536759 | 1.97E-06 | 9.36E-05  |
| LOC102633000  | 11.54389686 | 0.331065 | 34.869   | 5.123873115 | 4.62E-04 | 0.0086602 |
| Gm9640        | 80.59096277 | 2.35988  | 34.15045 | 5.093832895 | 3.93E-14 | 1.13E-11  |
| LOC102639975  | 33.77893582 | 1.037256 | 32.56567 | 5.025280117 | 5.03E-04 | 0.0092257 |
| LOC102635721  | 10.59476164 | 0.329429 | 32.16094 | 5.007237614 | 8.64E-04 | 0.0140228 |
| Gm5970        | 139.2592289 | 4.382153 | 31.77872 | 4.989989119 | 6.40E-12 | 1.08E-09  |
| Gm4827        | 10.1215062  | 0.331065 | 30.57259 | 4.934166797 | 0.004005 | 0.043634  |
| Gm5486        | 28.67235213 | 0.993194 | 28.86883 | 4.85144056  | 9.95E-08 | 7.15E-06  |
| Gm21188       | 57.7759886  | 2.02718  | 28.50068 | 4.832924211 | 1.74E-06 | 8.51E-05  |
| LOC102638237  | 140.9314155 | 4.988775 | 28.24971 | 4.820163971 | 1.13E-09 | 1.25E-07  |
| Trbj2-3       | 10.59246802 | 0.376762 | 28.11451 | 4.813242804 | 2.95E-04 | 0.0059584 |
| LOC628062     | 54.23687395 | 1.978212 | 27.41712 | 4.777004938 | 4.08E-11 | 5.89E-09  |
| Gm17250       | 37.73645579 | 1.415653 | 26.65658 | 4.73641954  | 1.04E-06 | 5.67E-05  |
| LOC102631660  | 8.697616019 | 0.329429 | 26.40206 | 4.722578407 | 0.001621 | 0.0224074 |

---



---

|               |             |          |          |             |          |           |
|---------------|-------------|----------|----------|-------------|----------|-----------|
| LOC102637355  | 9.224398706 | 0.376762 | 24.48338 | 4.613730809 | 9.57E-04 | 0.0154137 |
| LOC102638459  | 8.064462268 | 0.329429 | 24.48009 | 4.613536727 | 0.002075 | 0.0269004 |
| Tbx3os2       | 113.247942  | 4.76055  | 23.78883 | 4.572212644 | 4.10E-04 | 0.0079144 |
| LOC102638456  | 139.2998998 | 5.983604 | 23.28027 | 4.541035709 | 1.13E-07 | 7.94E-06  |
| LOC102632463  | 22.92849081 | 0.988288 | 23.2002  | 4.53606538  | 1.19E-06 | 6.36E-05  |
| Gm10768       | 170.4628738 | 7.351925 | 23.18616 | 4.53519177  | 3.83E-17 | 1.76E-14  |
| LOC102634481  | 8.116225287 | 0.376762 | 21.54207 | 4.429084848 | 0.004091 | 0.0443678 |
| Gm11658       | 27.30020296 | 1.320988 | 20.6665  | 4.369221897 | 8.89E-07 | 4.98E-05  |
| LOC102633661  | 15.44515458 | 0.753523 | 20.49725 | 4.357358341 | 1.06E-04 | 0.002594  |
| Gm7469        | 284.7256293 | 14.00937 | 20.32395 | 4.345108853 | 3.79E-19 | 2.38E-16  |
| 4933436C20Rik | 25.720715   | 1.317718 | 19.51914 | 4.286817232 | 6.06E-05 | 0.0016255 |
| LOC102640711  | 12.38813854 | 0.662129 | 18.70954 | 4.225702222 | 0.002083 | 0.0269027 |
| LOC102638159  | 100.086688  | 5.369067 | 18.64136 | 4.220434849 | 5.79E-09 | 5.32E-07  |
| Serpina3h     | 36.79058434 | 1.978212 | 18.5979  | 4.2170675   | 4.94E-09 | 4.60E-07  |
| LOC102631497  | 53.07726823 | 3.015468 | 17.60167 | 4.137640248 | 1.27E-09 | 1.35E-07  |
| 5830416119Rik | 42.27230078 | 2.403941 | 17.58458 | 4.136239076 | 3.23E-07 | 2.04E-05  |
| B930018H19Rik | 12.1764772  | 0.707826 | 17.20263 | 4.104557413 | 7.34E-04 | 0.0123418 |
| LOC102635203  | 11.33115473 | 0.660494 | 17.15557 | 4.10060511  | 0.001169 | 0.0178389 |
| LOC102631883  | 21.92589436 | 1.369956 | 16.00482 | 4.000434338 | 1.10E-05 | 3.93E-04  |
| LOC102637410  | 26.61927802 | 1.743447 | 15.26819 | 3.932456994 | 2.92E-06 | 1.28E-04  |
| Gpr31a        | 25.98449208 | 1.743447 | 14.90409 | 3.89763641  | 6.52E-06 | 2.56E-04  |
| Gad1-ps       | 20.34477422 | 1.368321 | 14.86843 | 3.894180026 | 1.37E-05 | 4.81E-04  |
| LOC102632005  | 19.39614639 | 1.322624 | 14.6649  | 3.874295455 | 5.26E-05 | 0.0014506 |
| LOC102640080  | 19.02729911 | 1.324259 | 14.36826 | 3.844813588 | 9.68E-05 | 0.0023963 |
| D630010B17Rik | 39.21643155 | 2.780703 | 14.10306 | 3.81793673  | 1.67E-07 | 1.13E-05  |
| Marcks11-ps5  | 27.24989546 | 1.983118 | 13.74094 | 3.780408294 | 1.66E-06 | 8.15E-05  |
| Gm6970        | 14.12708406 | 1.035621 | 13.64118 | 3.769896186 | 6.09E-04 | 0.0106093 |
| LOC102636919  | 19.1876828  | 1.415653 | 13.55395 | 3.760641104 | 8.74E-05 | 0.0022007 |
| Cxcl11        | 157.778249  | 11.82384 | 13.34408 | 3.738128179 | 5.32E-06 | 2.16E-04  |

---

---

|               |             |          |          |             |          |           |
|---------------|-------------|----------|----------|-------------|----------|-----------|
| Gata5os       | 17.70803776 | 1.366685 | 12.95692 | 3.695651283 | 1.37E-04 | 0.0031502 |
| LOC102632303  | 60.40736634 | 4.85685  | 12.43756 | 3.636631658 | 1.20E-09 | 1.29E-07  |
| LOC102636934  | 25.35588157 | 2.071241 | 12.24188 | 3.613752908 | 1.58E-05 | 5.31E-04  |
| LOC102640849  | 12.43785062 | 1.035621 | 12.01005 | 3.586169669 | 0.001437 | 0.0204414 |
| 4930412O13Rik | 12.7550009  | 1.082953 | 11.77798 | 3.55802072  | 0.001552 | 0.0215877 |
| LOC102638195  | 32.10200861 | 2.731736 | 11.75151 | 3.554773856 | 2.68E-06 | 1.20E-04  |
| Gad1os        | 15.28386676 | 1.36505  | 11.19656 | 3.48498375  | 4.25E-04 | 0.0081246 |
| Gm830         | 870.5822716 | 78.91517 | 11.03187 | 3.463606101 | 3.32E-16 | 1.21E-13  |
| Gm2379        | 10.85787729 | 1.035621 | 10.48442 | 3.390174558 | 0.003747 | 0.0416815 |
| Gm7582        | 19.18658    | 1.983118 | 9.674956 | 3.274255174 | 2.58E-04 | 0.0054044 |
| Gm14230       | 22.77097415 | 2.358244 | 9.655901 | 3.271410886 | 1.05E-04 | 0.0025791 |
| Gm5960        | 26.35477288 | 2.731736 | 9.64763  | 3.270174546 | 3.09E-05 | 9.45E-04  |
| F830208F22Rik | 12.70266448 | 1.317718 | 9.639896 | 3.269017628 | 0.001156 | 0.0176749 |
| C030034L19Rik | 39.79290431 | 4.19472  | 9.486426 | 3.245864612 | 3.68E-06 | 1.57E-04  |
| LOC102631796  | 156.3387008 | 16.50307 | 9.473313 | 3.243869038 | 1.60E-11 | 2.57E-09  |
| Gm379         | 188.798684  | 20.923   | 9.0235   | 3.173687095 | 4.56E-12 | 7.87E-10  |
| Gm7676        | 87.1780076  | 10.03986 | 8.68319  | 3.118225232 | 2.17E-08 | 1.84E-06  |
| AI427809      | 336.4807471 | 38.83354 | 8.664694 | 3.11514877  | 8.62E-13 | 1.86E-10  |
| Rpl19-ps3     | 103.7812464 | 12.16334 | 8.5323   | 3.09293464  | 1.41E-09 | 1.46E-07  |
| Marcks11-ps3  | 46.32920028 | 5.474918 | 8.462081 | 3.081012565 | 3.94E-06 | 1.67E-04  |
| Csf1r-ps      | 28.46274173 | 3.39223  | 8.39057  | 3.068768851 | 0.001298 | 0.01925   |
| Slfn10-ps     | 339.0184121 | 40.76089 | 8.317247 | 3.056106149 | 3.20E-12 | 5.96E-10  |
| Gm6545        | 45.54481533 | 5.518979 | 8.252398 | 3.044813407 | 1.20E-06 | 6.38E-05  |
| Gm4983        | 47.80445675 | 5.794536 | 8.24992  | 3.044380136 | 8.15E-07 | 4.61E-05  |
| AW112010      | 6489.677158 | 806.7199 | 8.044524 | 3.00800702  | 7.03E-14 | 1.94E-11  |
| Gm7803        | 1429.129017 | 179.3171 | 7.96984  | 2.994550832 | 5.24E-04 | 0.0094605 |
| LOC102632805  | 23.77242378 | 3.014093 | 7.88709  | 2.979493036 | 5.76E-05 | 0.001557  |
| 9430021M05Rik | 20.97872206 | 2.687674 | 7.805531 | 2.964496813 | 2.63E-04 | 0.0054859 |
| 1110028F11Rik | 117.8551779 | 15.36297 | 7.67138  | 2.939486212 | 2.67E-09 | 2.52E-07  |

---

|               |             |          |          |             |          |           |
|---------------|-------------|----------|----------|-------------|----------|-----------|
| LOC102640883  | 38.42463632 | 5.036107 | 7.62983  | 2.931650856 | 4.76E-06 | 1.98E-04  |
| LOC102634528  | 80.17037447 | 10.52738 | 7.615418 | 2.928923185 | 5.99E-06 | 2.40E-04  |
| G930009F23Rik | 80.59325639 | 11.27927 | 7.145258 | 2.836986052 | 9.57E-08 | 6.95E-06  |
| Gm9172        | 77.05958911 | 10.9939  | 7.009306 | 2.809271587 | 1.51E-07 | 1.03E-05  |
| Gm7192        | 51.33139782 | 7.689791 | 6.675266 | 2.738825281 | 1.93E-05 | 6.39E-04  |
| 5930412G12Rik | 22.19156833 | 3.348168 | 6.627973 | 2.728567767 | 6.94E-04 | 0.0118457 |
| A930038B10Rik | 19.02954872 | 2.873732 | 6.621894 | 2.727243909 | 5.80E-04 | 0.0102221 |
| Tubb2a-ps2    | 75.06125509 | 11.59234 | 6.475072 | 2.694896344 | 3.50E-07 | 2.18E-05  |

### Supplemental Table 3. The pathway enrichment analysis of differentially expressed mRNAs

| PathwayID  | PathwayTerm                                  | P-Value  | FDR      | Enrichment |
|------------|----------------------------------------------|----------|----------|------------|
| PATH:04514 | Cell adhesion molecules (CAMs)               | 4E-08    | 1.07E-05 | 2.245662   |
| PATH:05150 | Staphylococcus aureus infection              | 3.18E-06 | 0.000426 | 3.000506   |
| PATH:00980 | Metabolism of xenobiotics by cytochrome P450 | 0.000148 | 0.013228 | 2.055642   |
| PATH:05321 | Inflammatory bowel disease (IBD)             | 0.000236 | 0.015818 | 2.357871   |
| PATH:00982 | Drug metabolism - cytochrome P450            | 0.000361 | 0.017635 | 1.967274   |
| PATH:00053 | Ascorbate and aldarate metabolism            | 0.000395 | 0.017635 | 3.091431   |
| PATH:01100 | Metabolic pathways                           | 0.000508 | 0.019444 | 1.256052   |
| PATH:00040 | Pentose and glucuronate interconversions     | 0.000632 | 0.01977  | 2.727733   |
| PATH:00640 | Propanoate metabolism                        | 0.000786 | 0.01977  | 2.753306   |
| PATH:00983 | Drug metabolism - other enzymes              | 0.000814 | 0.01977  | 2.140221   |
| PATH:05140 | Leishmaniasis                                | 0.000814 | 0.01977  | 2.140221   |
| PATH:00500 | Starch and sucrose metabolism                | 0.000885 | 0.01977  | 2.274827   |
| PATH:04380 | Osteoclast differentiation                   | 0.001114 | 0.022973 | 1.752622   |
| PATH:05323 | Rheumatoid arthritis                         | 0.001333 | 0.023583 | 1.932144   |
| PATH:04020 | Calcium signaling pathway                    | 0.001397 | 0.023583 | 1.595577   |
| PATH:01200 | Carbon metabolism                            | 0.001408 | 0.023583 | 1.803335   |
| PATH:05204 | Chemical carcinogenesis                      | 0.001542 | 0.024314 | 1.854859   |

---

|            |                                                           |          |          |          |
|------------|-----------------------------------------------------------|----------|----------|----------|
| PATH:05144 | Malaria                                                   | 0.001709 | 0.02435  | 2.22583  |
| PATH:04512 | ECM-receptor interaction                                  | 0.001726 | 0.02435  | 1.8757   |
| PATH:04940 | Type I diabetes mellitus                                  | 0.001905 | 0.024997 | 2.086716 |
| PATH:04060 | Cytokine-cytokine receptor interaction                    | 0.001959 | 0.024997 | 1.475456 |
| PATH:02010 | ABC transporters                                          | 0.002687 | 0.03185  | 2.217766 |
| PATH:04976 | Bile secretion                                            | 0.002794 | 0.03185  | 1.932144 |
| PATH:05414 | Dilated cardiomyopathy                                    | 0.002852 | 0.03185  | 1.823597 |
| PATH:05330 | Allograft rejection                                       | 0.003083 | 0.032657 | 2.09984  |
| PATH:04978 | Mineral absorption                                        | 0.003288 | 0.032657 | 2.170579 |
| PATH:05416 | Viral myocarditis                                         | 0.00329  | 0.032657 | 1.803335 |
| PATH:04970 | Salivary secretion                                        | 0.003616 | 0.034612 | 1.866903 |
| PATH:05332 | Graft-versus-host disease                                 | 0.004441 | 0.041038 | 2.023482 |
| PATH:04145 | Phagosome                                                 | 0.006088 | 0.054386 | 1.510385 |
| PATH:05133 | Pertussis                                                 | 0.006374 | 0.055104 | 1.81726  |
| PATH:00071 | Fatty acid degradation                                    | 0.007271 | 0.059962 | 2.028752 |
| PATH:00330 | Arginine and proline metabolism                           | 0.007383 | 0.059962 | 1.918819 |
| PATH:04080 | Neuroactive ligand-receptor interaction                   | 0.007834 | 0.060618 | 1.381278 |
| PATH:04260 | Cardiac muscle contraction                                | 0.007917 | 0.060618 | 1.760942 |
| PATH:00280 | Valine, leucine and isoleucine degradation                | 0.008235 | 0.061303 | 1.96187  |
| PATH:04360 | Axon guidance                                             | 0.008784 | 0.063623 | 1.557251 |
| PATH:05145 | Toxoplasmosis                                             | 0.00944  | 0.066254 | 1.557515 |
| PATH:05410 | Hypertrophic cardiomyopathy (HCM)                         | 0.009641 | 0.066254 | 1.711328 |
| PATH:04390 | Hippo signaling pathway                                   | 0.009993 | 0.066953 | 1.505567 |
| PATH:05412 | Arrhythmogenic right ventricular cardiomyopathy<br>(ARVC) | 0.010385 | 0.067881 | 1.754596 |
| PATH:00140 | Steroid hormone biosynthesis                              | 0.010952 | 0.069883 | 1.691195 |
| PATH:04612 | Antigen processing and presentation                       | 0.01262  | 0.078658 | 1.702244 |
| PATH:05217 | Basal cell carcinoma                                      | 0.013364 | 0.0788   | 1.854859 |
| PATH:04610 | Complement and coagulation cascades                       | 0.013549 | 0.0788   | 1.708422 |

---

---

|            |                                              |          |          |          |
|------------|----------------------------------------------|----------|----------|----------|
| PATH:00410 | beta-Alanine metabolism                      | 0.013583 | 0.0788   | 2.173662 |
| PATH:04911 | Insulin secretion                            | 0.014008 | 0.0788   | 1.652317 |
| PATH:04932 | Non-alcoholic fatty liver disease (NAFLD)    | 0.014113 | 0.0788   | 1.475456 |
| PATH:04672 | Intestinal immune network for IgA production | 0.016075 | 0.087918 | 1.915343 |
| PATH:01212 | Fatty acid metabolism                        | 0.017718 | 0.094967 | 1.854859 |
| PATH:00564 | Glycerophospholipid metabolism               | 0.01984  | 0.101707 | 1.597239 |
| PATH:00830 | Retinol metabolism                           | 0.01984  | 0.101707 | 1.597239 |
| PATH:00860 | Porphyrin and chlorophyll metabolism         | 0.020114 | 0.101707 | 1.897014 |
| PATH:04151 | PI3K-Akt signaling pathway                   | 0.021052 | 0.104479 | 1.285152 |
| PATH:04650 | Natural killer cell mediated cytotoxicity    | 0.022274 | 0.108533 | 1.494617 |
| PATH:04974 | Protein digestion and absorption             | 0.023907 | 0.114412 | 1.580845 |
| PATH:04972 | Pancreatic secretion                         | 0.027333 | 0.128515 | 1.502779 |
| PATH:04930 | Type II diabetes mellitus                    | 0.029635 | 0.134491 | 1.762116 |
| PATH:04668 | TNF signaling pathway                        | 0.030071 | 0.134491 | 1.488992 |
| PATH:00920 | Sulfur metabolism                            | 0.030192 | 0.134491 | 2.45496  |
| PATH:04725 | Cholinergic synapse                          | 0.030612 | 0.134491 | 1.477321 |
| PATH:00650 | Butanoate metabolism                         | 0.032175 | 0.139079 | 2.00943  |
| PATH:05310 | Asthma                                       | 0.035651 | 0.149729 | 2.125359 |
| PATH:01230 | Biosynthesis of amino acids                  | 0.03632  | 0.149729 | 1.56579  |
| PATH:00380 | Tryptophan metabolism                        | 0.036736 | 0.149729 | 1.73893  |
| PATH:03320 | PPAR signaling pathway                       | 0.037395 | 0.149729 | 1.545715 |
| PATH:05152 | Tuberculosis                                 | 0.037432 | 0.149729 | 1.354672 |
| PATH:04350 | TGF-beta signaling pathway                   | 0.039278 | 0.15335  | 1.51098  |
| PATH:04261 | Adrenergic signaling in cardiomyocytes       | 0.039482 | 0.15335  | 1.381931 |
| PATH:00512 | Mucin type O-Glycan biosynthesis             | 0.040885 | 0.154862 | 1.987348 |
| PATH:00480 | Glutathione metabolism                       | 0.041027 | 0.154862 | 1.656124 |
| PATH:05340 | Primary immunodeficiency                     | 0.04246  | 0.158044 | 1.854859 |
| PATH:05320 | Autoimmune thyroid disease                   | 0.04606  | 0.169097 | 1.568447 |
| PATH:00340 | Histidine metabolism                         | 0.048741 | 0.176521 | 1.918819 |

---

---

|            |                                           |          |          |          |
|------------|-------------------------------------------|----------|----------|----------|
| PATH:00010 | Glycolysis / Gluconeogenesis              | 0.049916 | 0.177436 | 1.569496 |
| PATH:04340 | Hedgehog signaling pathway                | 0.050318 | 0.177436 | 1.631589 |
| PATH:04960 | Aldosterone-regulated sodium reabsorption | 0.056412 | 0.196342 | 1.686235 |
| PATH:00524 | Butirosin and neomycin biosynthesis       | 0.05892  | 0.200839 | 3.709717 |
| PATH:00514 | Other types of O-glycan biosynthesis      | 0.059203 | 0.200839 | 1.642323 |
| PATH:04146 | Peroxisome                                | 0.060498 | 0.202669 | 1.470315 |
| PATH:00590 | Arachidonic acid metabolism               | 0.06332  | 0.206949 | 1.419535 |
| PATH:04713 | Circadian entrainment                     | 0.06332  | 0.206949 | 1.419535 |
| PATH:00190 | Oxidative phosphorylation                 | 0.065366 | 0.211062 | 1.338894 |
| PATH:04664 | Fc epsilon RI signaling pathway           | 0.066446 | 0.211993 | 1.4526   |
| PATH:05200 | Pathways in cancer                        | 0.070493 | 0.222261 | 1.212142 |
| PATH:05020 | Prion diseases                            | 0.072043 | 0.222582 | 1.722369 |
| PATH:05010 | Alzheimer's disease                       | 0.072256 | 0.222582 | 1.288096 |
| PATH:04621 | NOD-like receptor signaling pathway       | 0.073157 | 0.222797 | 1.520376 |
| PATH:04726 | Serotonergic synapse                      | 0.080192 | 0.241476 | 1.311193 |
| PATH:04510 | Focal adhesion                            | 0.08254  | 0.245787 | 1.254494 |
| PATH:04730 | Long-term depression                      | 0.084694 | 0.249179 | 1.441275 |
| PATH:04015 | Rap1 signaling pathway                    | 0.085723 | 0.249179 | 1.24516  |
| PATH:00051 | Fructose and mannose metabolism           | 0.086469 | 0.249179 | 1.623001 |
| PATH:05166 | HTLV-I infection                          | 0.095185 | 0.271377 | 1.204668 |
| PATH:00565 | Ether lipid metabolism                    | 0.097817 | 0.275947 | 1.583416 |
| PATH:05143 | African trypanosomiasis                   | 0.1031   | 0.287822 | 1.63664  |
| PATH:04964 | Proximal tubule bicarbonate reclamation   | 0.109381 | 0.298675 | 1.854859 |
| PATH:04620 | Toll-like receptor signaling pathway      | 0.110087 | 0.298675 | 1.331458 |
| PATH:04062 | Chemokine signaling pathway               | 0.110331 | 0.298675 | 1.228844 |

---
